# Supplementary material for: [(Me)2NH2]0.75[Ag1.25SnSe3]: A three-dimensionally microporous chalcogenide exhibiting framework flexibility upon ion-exchange
Source: Royal Society of Chemistry journal article supplement (doi:10.1039/c0dt01381a), 2011-01-01
Supplement: c0dt01381a.pdf [file c0dt01381a.pdf]

## Supporting Information

### **[(Me)<sub>2</sub>NH<sub>2</sub>]<sub>0.75</sub>[Ag<sub>1.25</sub>SnSe<sub>3</sub>]: A Three-dimensionally Microporous Chalcogenide Exhibiting Framework Flexibility Upon Ion-exchange**

By *Jian-Rong Li* and *Xiao-Ying Huang\**

State Key Laboratory of Structural Chemistry, Fujian Institute of Research on the Structure of Matter, Chinese Academy of Sciences, Fuzhou, Fujian 350002, P. R.

China. Fax: (+86) 591-83793727

E-mail: [xyhuang@fjirsm.ac.cn](mailto:xyhuang@fjirsm.ac.cn)

(Jian-Rong Li) Graduate School, Chinese Academy of Sciences  
Beijing 100039, P. R. China.

#### **1. More Structural details**

The intensity data were collected on a Rigaku SCXmini CCD diffractometer for **1**, **1Cs**, **1Rb** and a Rigaku Mercury CCD diffractometer for **1NH<sub>4</sub>** with graphite-monochromated MoK $\alpha$  radiation ( $\lambda = 0.71073 \text{ \AA}$ ) at room temperature. The structures were solved by direct methods and refined by full-matrix least-squares on  $F^2$  using the SHELX97 program package.<sup>[1]</sup> The hydrogen atoms attached to the C and N atoms in compound **1** were located at geometrically calculated positions, and the restraints (DFIX, ISOR and SIMU) were applied on C and N atoms to obtain chemical-reasonable models for disordered dimethylammonium ions. The Cs1 ion in compound **1Cs** showed positional disorder and was refined split into three non-equivalent positions Cs1A, Cs1B and Cs1C, respectively, while the Cs2 ion was half-occupied. The water molecules are also half-occupied. The hydrogen atoms of the water molecules were not added. In the structure of **1Rb**, the Rb1 ion showed positional disorder and was refined split into two non-equivalent positions Rb1A and Rb1B, respectively, while the Rb2 ion was half-occupied. The residual dimethylammonium cations in **1Cs** and **1Rb** could not be found in the difference Fourier maps, therefore were not included in the structure refinements. In the structure of **1NH<sub>4</sub>**, the hydrogen atoms were not added, and the restraints (DFIX and SIMU) were applied on C and N atoms to obtain chemical-reasonable models for the disordered dimethylammonium ion. The empirical formulae for **1Cs**, **1Rb**, and **1NH<sub>4</sub>** were calculated based on the TGA, EA and EDS results. The crystal data and structure refinement details are listed in Table S1. The selected bond lengths and angles of compounds **1**, **1Cs**, **1Rb**, and **1NH<sub>4</sub>** are listed in Table S2.

[1] G. M. Sheldrick, *SHELXS97 and SHELXL97*, University of Göttingen, Germany, **1997**.

**Table S1** Crystallographic data for compound **1** and the ion-exchanged products

|                                                                                                                   | <b>1</b>                                                                                     | <b>1Cs</b>                                                                                                                                        | <b>1Rb</b>                                                                                                                                     | <b>1NH<sub>4</sub></b>                                                                                                                                           |
|-------------------------------------------------------------------------------------------------------------------|----------------------------------------------------------------------------------------------|---------------------------------------------------------------------------------------------------------------------------------------------------|------------------------------------------------------------------------------------------------------------------------------------------------|------------------------------------------------------------------------------------------------------------------------------------------------------------------|
| Formula                                                                                                           | [(Me) <sub>2</sub> NH <sub>2</sub> ] <sub>0.75</sub> [Ag <sub>1.25</sub> SnSe <sub>3</sub> ] | [Me <sub>2</sub> NH <sub>2</sub> ] <sub>0.05</sub> Cs <sub>0.70</sub><br>[Ag <sub>1.25</sub> SnSe <sub>3</sub> ] <sub>0.25</sub> H <sub>2</sub> O | [Me <sub>2</sub> NH <sub>2</sub> ] <sub>0.10</sub> Rb <sub>0.65</sub> [Ag <sub>1.25</sub> SnSe <sub>3</sub> ] <sub>0.75</sub> H <sub>2</sub> O | [Me <sub>2</sub> NH <sub>2</sub> ] <sub>0.25</sub> (NH <sub>4</sub> ) <sub>0.50</sub><br>[Ag <sub>1.25</sub> SnSe <sub>3</sub> ] <sub>0.5</sub> H <sub>2</sub> O |
| Empirical formula                                                                                                 | C <sub>1.50</sub> H <sub>6</sub> Ag <sub>1.25</sub> N <sub>0.75</sub> Se <sub>3</sub> Sn     | C <sub>0.10</sub> H <sub>0.90</sub> Ag <sub>1.25</sub> Cs <sub>0.70</sub> N <sub>0.05</sub> O <sub>0.25</sub> Se <sub>3</sub> Sn                  | C <sub>0.20</sub> H <sub>2.30</sub> Ag <sub>1.25</sub> N <sub>0.10</sub> O <sub>0.75</sub> Rb <sub>0.65</sub> Se <sub>3</sub> Sn               | C <sub>0.50</sub> H <sub>5</sub> Ag <sub>1.25</sub> N <sub>0.75</sub> O <sub>0.50</sub> S <sub>e<sub>3</sub>Sn</sub>                                             |
| Crystal Size (mm)                                                                                                 | 0.25×0.16×0.14                                                                               | 0.16×0.14×0.12                                                                                                                                    | 0.11×0.10×0.09                                                                                                                                 | 0.07×0.06×0.05                                                                                                                                                   |
| Crystal system                                                                                                    | tetragonal                                                                                   | tetragonal                                                                                                                                        | tetragonal                                                                                                                                     | tetragonal                                                                                                                                                       |
| Space group                                                                                                       | <i>P</i> -42 <sub>1</sub> <i>m</i>                                                           | <i>P</i> -42 <sub>1</sub> <i>m</i>                                                                                                                | <i>P</i> -42 <sub>1</sub> <i>m</i>                                                                                                             | <i>P</i> -42 <sub>1</sub> <i>m</i>                                                                                                                               |
| <i>a</i> (Å)                                                                                                      | 13.8051(8)                                                                                   | 13.9886(8)                                                                                                                                        | 13.998(2)                                                                                                                                      | 13.9087(6)                                                                                                                                                       |
| <i>c</i> (Å)                                                                                                      | 9.6707(9)                                                                                    | 8.8534(13)                                                                                                                                        | 8.6852(17)                                                                                                                                     | 8.8618(7)                                                                                                                                                        |
| <i>V</i> (Å <sup>3</sup> )                                                                                        | 1843.0(2)                                                                                    | 1732.4(3)                                                                                                                                         | 1701.9(5)                                                                                                                                      | 1714.33(17)                                                                                                                                                      |
| <i>Z</i>                                                                                                          | 8                                                                                            | 8                                                                                                                                                 | 8                                                                                                                                              | 8                                                                                                                                                                |
| $\mu$ (mm <sup>-1</sup> )                                                                                         | 17.113                                                                                       | 21.097                                                                                                                                            | 22.227                                                                                                                                         | 18.400                                                                                                                                                           |
| <i>F</i> (000)                                                                                                    | 1848                                                                                         | 2025                                                                                                                                              | 1960                                                                                                                                           | 1824                                                                                                                                                             |
| $\theta$ range (°)                                                                                                | 2.57 to 27.46                                                                                | 2.72 to 27.47                                                                                                                                     | 2.76 to 27.49                                                                                                                                  | 2.73 to 27.46                                                                                                                                                    |
| Reflections measured                                                                                              | 14465                                                                                        | 13505                                                                                                                                             | 13288                                                                                                                                          | 13455                                                                                                                                                            |
| Independent reflections                                                                                           | 2228                                                                                         | 2105                                                                                                                                              | 2066                                                                                                                                           | 2056                                                                                                                                                             |
| Observed Reflection<br>[ <i>I</i> >2 $\sigma$ ( <i>I</i> )]                                                       | 2068                                                                                         | 1886                                                                                                                                              | 1771                                                                                                                                           | 1973                                                                                                                                                             |
| Temperature (K)                                                                                                   | 293                                                                                          | 293                                                                                                                                               | 293                                                                                                                                            | 293                                                                                                                                                              |
| $\rho_{\text{calc}}$ /g cm <sup>-3</sup>                                                                          | 3.784                                                                                        | 4.526                                                                                                                                             | 4.403                                                                                                                                          | 4.029                                                                                                                                                            |
| Parameter                                                                                                         | 86                                                                                           | 84                                                                                                                                                | 84                                                                                                                                             | 84                                                                                                                                                               |
| <i>R</i> <sub>int</sub>                                                                                           | 0.0538                                                                                       | 0.0598                                                                                                                                            | 0.0888                                                                                                                                         | 0.0648                                                                                                                                                           |
| <i>R</i> <sub>1</sub> , <i>wR</i> <sub>2</sub> [ <i>I</i> >2 $\sigma$ ( <i>I</i> )] <sup><i>a</i>, <i>b</i></sup> | 0.0366, 0.0799                                                                               | 0.0520, 0.1423                                                                                                                                    | 0.0639, 0.1399                                                                                                                                 | 0.0465, 0.0910                                                                                                                                                   |
| <i>GOF</i>                                                                                                        | 1.074                                                                                        | 1.081                                                                                                                                             | 1.084                                                                                                                                          | 1.152                                                                                                                                                            |
| Largest diff. Peak and<br>hole/e Å <sup>-3</sup>                                                                  | 1.037, -1.006                                                                                | 2.021, -1.583                                                                                                                                     | 1.066, -1.083                                                                                                                                  | 0.961, -1.018                                                                                                                                                    |

$$^a R_1 = \sum \| |F_o| - |F_c| \| / \sum |F_o|, \quad ^b wR_2 = [ \sum w(F_o^2 - F_c^2)^2 / \sum w(F_o^2)^2 ]^{0.5}$$

**Table S2.** Selected bond lengths (Å) and angles (°) for **1** and the ion-exchanged products **1NH<sub>4</sub>**, **1Cs**, and **1Rb**.

|                                                                                                     | <b>1</b>    | <b>1NH<sub>4</sub></b> |                                                                                                             | <b>1Cs</b> | <b>1Rb</b> |
|-----------------------------------------------------------------------------------------------------|-------------|------------------------|-------------------------------------------------------------------------------------------------------------|------------|------------|
| Sn(1)-Se(1)                                                                                         | 2.4861(10)  | 2.4795(13)             | Sn(1)-Se(1)                                                                                                 | 2.4804(16) | 2.480(2)   |
| Sn(1)-Se(2)                                                                                         | 2.5064(11)  | 2.5040(14)             | Sn(1)-Se(2)                                                                                                 | 2.5048(16) | 2.501(2)   |
| Sn(1)-Se(3)                                                                                         | 2.5795(12)  | 2.5756(15)             | Sn(1)-Se(3)                                                                                                 | 2.5809(19) | 2.575(2)   |
| Sn(1)-Se(4)                                                                                         | 2.5595(11)  | 2.5701(14)             | Sn(1)-Se(4)                                                                                                 | 2.5777(18) | 2.570(2)   |
| Ag(1)-Se(2)#1                                                                                       | 2.5950(12)  | 2.5823(15)             | Ag(1)-Se(2)#1                                                                                               | 2.5782(18) | 2.582(2)   |
| Ag(1)-Se(1)                                                                                         | 2.6281(13)  | 2.6151(17)             | Ag(1)-Se(1)                                                                                                 | 2.620(2)   | 2.610(3)   |
| Ag(1)-Se(2)#2                                                                                       | 2.6554(13)  | 2.6687(17)             | Ag(1)-Se(2)#2                                                                                               | 2.672(2)   | 2.678(3)   |
| Ag(1)-Ag(1)#1                                                                                       | 3.1826(17)  | 3.208(2)               | Ag(1)-Ag(1)#1                                                                                               | 3.185(2)   | 3.208(3)   |
| Ag(1)-Ag(1)#2                                                                                       | 3.2414(16)  | 3.208(2)               | Ag(1)-Ag(1)#2                                                                                               | 3.221(3)   | 3.185(3)   |
| Ag(1)-Ag(1)#3                                                                                       | 3.2414(16)  | 3.228(2)               | Ag(1)-Ag(1)#3                                                                                               | 3.221(3)   | 3.185(3)   |
| Ag(2)-Se(1)#1                                                                                       | 2.6759(10)  | 2.6888(12)             | Ag(2)-Se(1)                                                                                                 | 2.7022(15) | 2.7012(19) |
| Ag(2)-Se(1)#4                                                                                       | 2.6759(10)  | 2.6888(12)             | Ag(2)-Se(1)#1                                                                                               | 2.7022(15) | 2.7012(19) |
| Ag(2)-Se(1)#5                                                                                       | 2.6759(10)  | 2.6888(12)             | Ag(2)-Se(1)#4                                                                                               | 2.7022(15) | 2.7012(19) |
| Ag(2)-Se(1)                                                                                         | 2.6759(10)  | 2.6888(12)             | Ag(2)-Se(1)#5                                                                                               | 2.7022(15) | 2.7012(19) |
| Se(1)-Sn(1)-Se(2)                                                                                   | 119.59(4)   | 120.46(5)              | Se(1)-Sn(1)-Se(2)                                                                                           | 120.35(6)  | 120.31(7)  |
| Se(1)-Sn(1)-Se(4)                                                                                   | 108.84(4)   | 108.68(6)              | Se(1)-Sn(1)-Se(4)                                                                                           | 109.39(7)  | 109.77(9)  |
| Se(2)-Sn(1)-Se(4)                                                                                   | 108.72(5)   | 106.61(6)              | Se(2)-Sn(1)-Se(4)                                                                                           | 107.49(8)  | 105.97(10) |
| Se(1)-Sn(1)-Se(3)                                                                                   | 114.21(5)   | 113.13(6)              | Se(1)-Sn(1)-Se(3)                                                                                           | 112.99(8)  | 112.06(10) |
| Se(2)-Sn(1)-Se(3)                                                                                   | 106.95(4)   | 109.17(6)              | Se(2)-Sn(1)-Se(3)                                                                                           | 107.87(8)  | 110.18(10) |
| Se(4)-Sn(1)-Se(3)                                                                                   | 95.85(3)    | 95.72(4)               | Se(4)-Sn(1)-Se(3)                                                                                           | 95.87(5)   | 95.49(7)   |
| Se(2)#1-Ag(1)-Se(1)                                                                                 | 123.55(5)   | 124.35(6)              | Se(2)#1-Ag(1)-Se(1)                                                                                         | 126.26(8)  | 125.40(9)  |
| Se(2)#1-Ag(1)-Se(2)#2                                                                               | 116.98(4)   | 119.30(5)              | Se(2)#1-Ag(1)-Se(2)#2                                                                                       | 118.06(6)  | 119.79(7)  |
| Se(1)-Ag(1)-Se(2)#2                                                                                 | 114.76(4)   | 110.94(5)              | Se(1)-Ag(1)-Se(2)#2                                                                                         | 109.90(6)  | 108.83(8)  |
| Se(1)#1-Ag(2)-Se(1)#4                                                                               | 105.209(19) | 99.45(2)               | Se(1)#1-Ag(2)-Se(1)#4                                                                                       | 99.23(2)   | 98.67(3)   |
| Se(1)#1-Ag(2)-Se(1)                                                                                 | 118.38(4)   | 132.18(6)              | Se(1)#1-Ag(2)-Se(1)                                                                                         | 132.77(7)  | 134.30(8)  |
| Se(1)#4-Ag(2)-Se(1)                                                                                 | 105.209(19) | 99.45(2)               | Se(1)#4-Ag(2)-Se(1)                                                                                         | 99.23(2)   | 98.67(3)   |
| Se(1)#1-Ag(2)-Se(1)#5                                                                               | 105.209(19) | 99.45(2)               | Se(1)#1-Ag(2)-Se(1)#5                                                                                       | 99.23(2)   | 98.67(3)   |
| Se(1)#4-Ag(2)-Se(1)#5                                                                               | 118.38(4)   | 132.18(6)              | Se(1)#4-Ag(2)-Se(1)#5                                                                                       | 132.79(7)  | 134.30(8)  |
| Se(1)-Ag(2)-Se(1)#5                                                                                 | 105.209(19) | 99.45(2)               | Se(1)-Ag(2)-Se(1)#5                                                                                         | 99.23(2)   | 98.67(3)   |
| Ag(1)-Se(1)-Ag(2)                                                                                   | 97.87(4)    | 87.76(4)               | Ag(1)-Se(1)-Ag(2)                                                                                           | 86.36(5)   | 85.38(7)   |
| Sn(1)-Se(1)-Ag(2)                                                                                   | 103.02(3)   | 96.50(4)               | Sn(1)-Se(1)-Ag(2)                                                                                           | 97.02(5)   | 95.81(6)   |
| Sn(1)-Se(1)-Ag(1)                                                                                   | 83.06(4)    | 84.56(5)               | Sn(1)-Se(1)-Ag(1)                                                                                           | 84.38(6)   | 85.49(7)   |
| Ag(1)#1-Se(2)-Ag(1)#3                                                                               | 76.24(4)    | 75.30(6)               | Ag(1)#1-Se(2)-Ag(1)#3                                                                                       | 75.65(7)   | 74.49(8)   |
| Sn(1)-Se(2)-Ag(1)#1                                                                                 | 104.35(4)   | 106.35(5)              | Sn(1)-Se(2)-Ag(1)#1                                                                                         | 106.02(6)  | 106.38(8)  |
| Sn(1)-Se(2)-Ag(1)#3                                                                                 | 96.81(4)    | 94.25(5)               | Sn(1)-Se(2)-Ag(1)#3                                                                                         | 94.69(6)   | 93.33(7)   |
| Symmetry codes: #1 -x, -y, z;<br>#2 y, -x, -z+1; #3 -y, x, -z+1;<br>#4 -y, x, -z+2; #5 y, -x, -z+2. |             |                        | Symmetry codes: #1 -x+1, -y+1, z;<br>#2 -y+1, x, -z+1; #3 y, -x+1, -z+1;<br>#4 y, -x+1, -z; #5 -y+1, x, -z. |            |            |

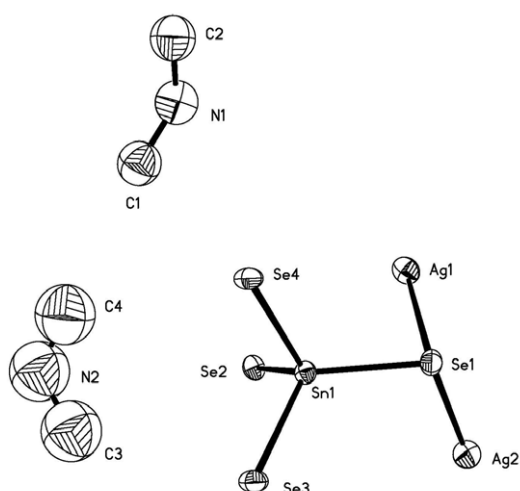

**Fig. S1** ORTEP plot showing the crystallographically asymmetric unit in the compound **1**; thermal ellipsoids are given at the 30% probability level.

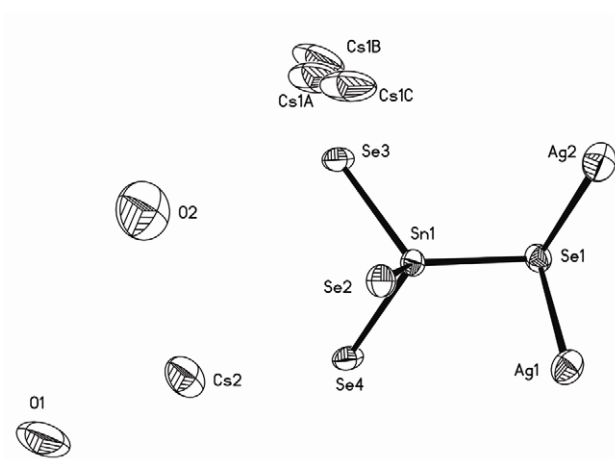

**Fig. S2** ORTEP plot showing the crystallographically asymmetric unit in the compound **1Cs**; thermal ellipsoids are given at the 30% probability level.

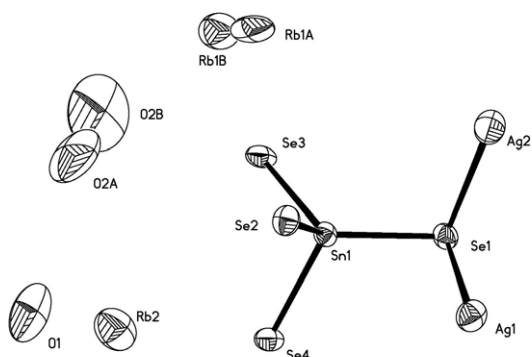

**Fig. S3** ORTEP plot showing the crystallographically asymmetric unit in the compound **1Rb**; thermal ellipsoids are given at the 30% probability level.

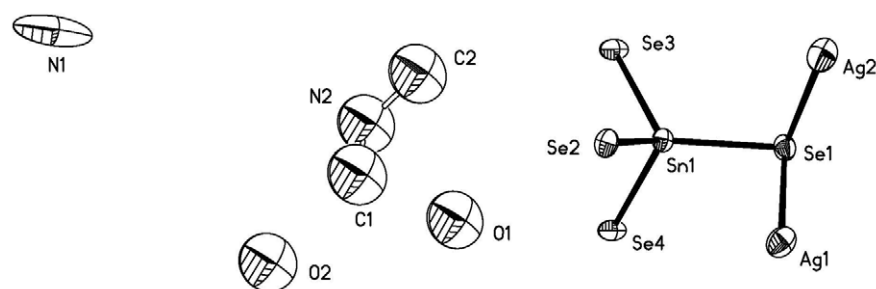

**Fig. S4** ORTEP plot showing the crystallographically asymmetric unit in the compound  $1\text{NH}_4$ ; thermal ellipsoids are given at the 30% probability level.

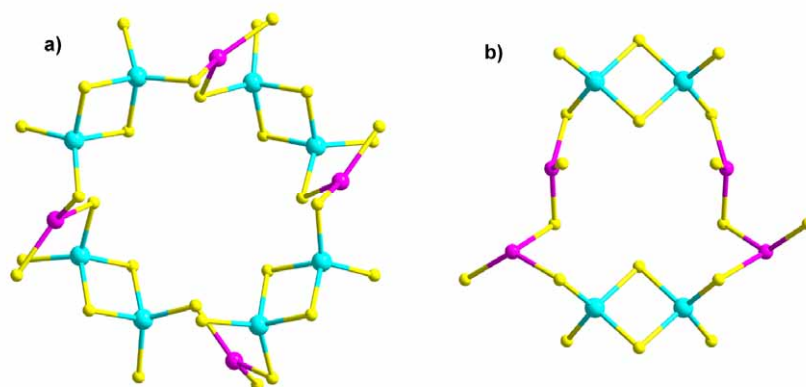

**Fig. S5** View of (a) the 24-membered ring window of the channel in the compound **1** along the  $c$  axis, and (b) the 16-membered ring window of the channel along the  $[110]$  direction. The Sn, Ag, Se atoms are drawn as turquoise, pink, and yellow balls, respectively.

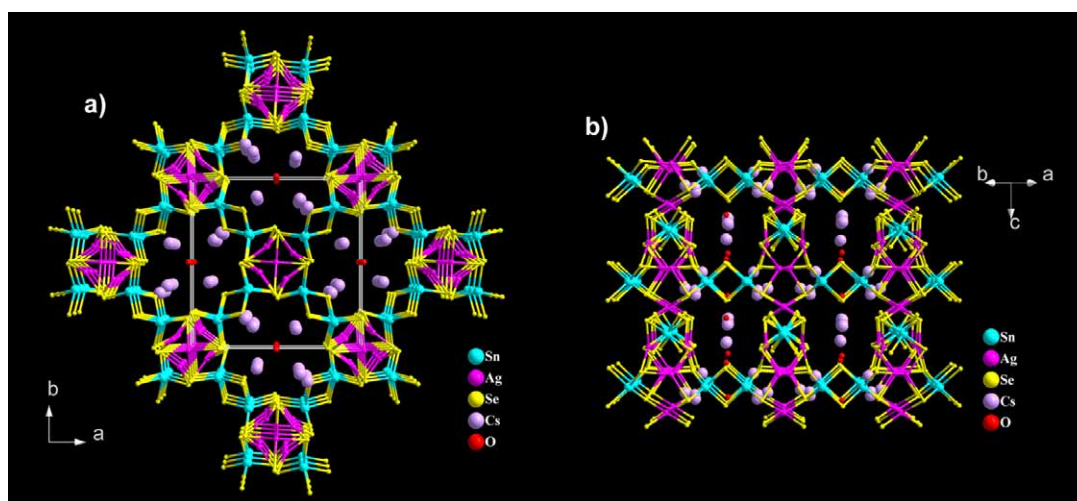

**Fig. S6** View of the structure of Cs-exchanged product (**1Cs**) along the *c* axis (a) and [110] direction (b).

## 2. Physical measurements

All chemicals employed in this study were analytical reagents and commercially available without further purification, except that AgCl was synthesized by the reaction of AgNO<sub>3</sub> and KCl. Microprobe elemental analyses were performed by using a field-emission scanning electron microscope (FESEM, JSM6700F) equipped with an energy-dispersive X-ray spectroscope (EDS, Oxford INCA). C, H and N analyses were performed on a German Elementary Vario EL III instrument. Powder X-ray diffraction (PXRD) patterns were recorded on a Rigaku MiniFlex II using CuK $\alpha$  radiation. Optical diffuse reflectance spectra were measured at room temperature with a Perkin-Elmer Lambda 900 UV/Vis spectrophotometer. A BaSO<sub>4</sub> plate was used as a standard (100% reflectance). The absorption spectra were calculated from reflectance spectra by using the Kubelka–Munk function:  $a/S = (1-R)^2/2R$ ,<sup>[1]</sup> where *a* is the absorption coefficient, *S* is the scattering coefficient which is practically independent of wavelength when the particle size is larger than 5  $\mu\text{m}$ , and *R* is the reflectance. Thermogravimetric analyses were carried out using crystalline samples loaded in Al<sub>2</sub>O<sub>3</sub> crucibles with a NETZSCH STA 449F3 unit at a heating rate of 5 °C/min under a nitrogen atmosphere.

[1] W. M. Wendlandt, H. G. Hecht, *Reflectance Spectroscopy*, Interscience, New York, 1966.

### 2a). Elemental analyses

**Table S3.** Elemental analyses of **1** and the ion-exchange products

| Exchanged Cations            | EDS result                                                               | N, C, H, analysis (%) (Calc.)          | Estimated formula                                                                                                                                     | Exchange yield (%) |
|------------------------------|--------------------------------------------------------------------------|----------------------------------------|-------------------------------------------------------------------------------------------------------------------------------------------------------|--------------------|
| compound <b>1</b>            | Ag <sub>1.24</sub> SnSe <sub>2.83</sub>                                  | 1.86, 3.43, 1.02<br>(2.00, 3.42, 1.14) | /                                                                                                                                                     | /                  |
| Cs <sup>+</sup>              | Sn <sub>0.94</sub> Ag <sub>1.18</sub> Se <sub>3</sub> Cs <sub>0.70</sub> | 0.3<, 0.3<, 0.3<<br>(0.12 0.20 0.15)   | [SnAg <sub>1.25</sub> Se <sub>3</sub> ][Me <sub>2</sub> NH <sub>2</sub> ] <sub>0.05</sub> Cs <sub>0.70</sub><br>·0.25H <sub>2</sub> O                 | 93                 |
| Rb <sup>+</sup>              | Ag <sub>1.32</sub> SnSe <sub>3.19</sub> Rb <sub>0.65</sub>               | 0.3< 0.5, 0.62<br>(0.25, 0.43, 0.41)   | [Me <sub>2</sub> NH <sub>2</sub> ] <sub>0.10</sub> Rb <sub>0.65</sub> [Ag <sub>1.25</sub> SnSe <sub>3</sub> ]<br>·0.75H <sub>2</sub> O                | 87                 |
| NH <sub>4</sub> <sup>+</sup> | /                                                                        | 1.81, 1.08, 0.72<br>(2.02, 1.16, 0.97) | [Me <sub>2</sub> NH <sub>2</sub> ] <sub>0.25</sub> (NH <sub>4</sub> ) <sub>0.50</sub> [Ag <sub>1.25</sub> SnSe <sub>3</sub> ]<br>·0.5H <sub>2</sub> O | 67                 |

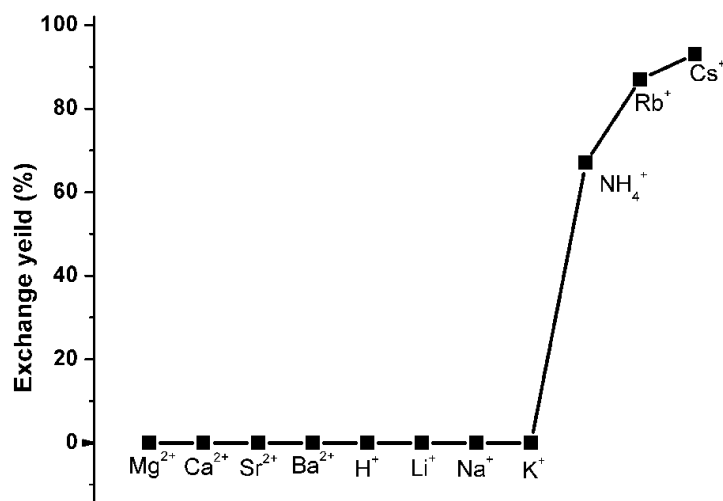

**Fig. S7.** The Cs<sup>+</sup>, Rb<sup>+</sup>, K<sup>+</sup>, Na<sup>+</sup>, Li<sup>+</sup>, H<sup>+</sup>, Ba<sup>2+</sup>, Sr<sup>2+</sup>, Ca<sup>2+</sup>, Mg<sup>2+</sup> and NH<sub>4</sub><sup>+</sup> ion-exchanged yields for the single ion-exchange experiments are plotted.

**Table S4.** Elemental analysis results for various single-ion-exchanged products‡

| Exchanged Cation | EDS result                              |
|------------------|-----------------------------------------|
| K <sup>+</sup>   | Ag <sub>1.40</sub> SnSe <sub>3.30</sub> |
| Na <sup>+</sup>  | Ag <sub>1.37</sub> SnSe <sub>2.90</sub> |
| Li <sup>+</sup>  | Ag <sub>1.32</sub> SnSe <sub>3.15</sub> |
| Ba <sup>2+</sup> | Ag <sub>1.28</sub> SnSe <sub>3.21</sub> |
| Sr <sup>2+</sup> | Ag <sub>1.23</sub> SnSe <sub>3.20</sub> |
| Ca <sup>2+</sup> | Ag <sub>1.33</sub> SnSe <sub>3.09</sub> |
| Mg <sup>2+</sup> | Ag <sub>1.37</sub> SnSe <sub>2.90</sub> |

‡ The results of TGA and EA for the H<sup>+</sup> exchanged products are in accordance with those of the pristine, indicating that no H<sup>+</sup> was exchanged.

## 2b) PXRD

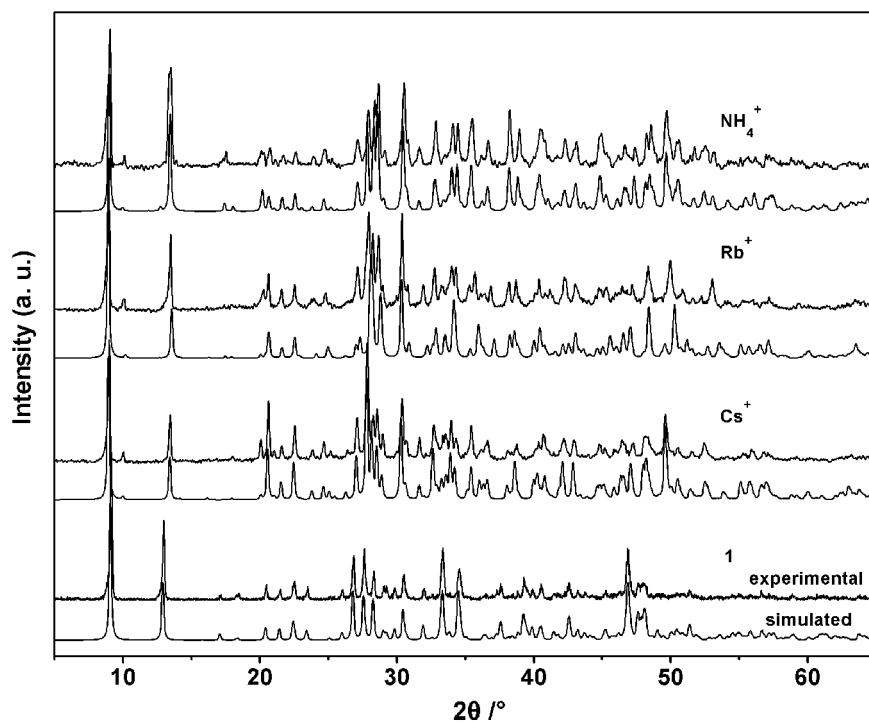

**Fig. S8.** The experimental PXRD patterns of the pristine compound **1**, Cs<sup>+</sup>, Rb<sup>+</sup> and NH<sub>4</sub><sup>+</sup>-exchanged products (top) are comparable with the simulated PXRD patterns (bottom) calculated from the respective single crystal X-ray data of **1**, **1Cs**, **1Rb** and **1NH<sub>4</sub>**.

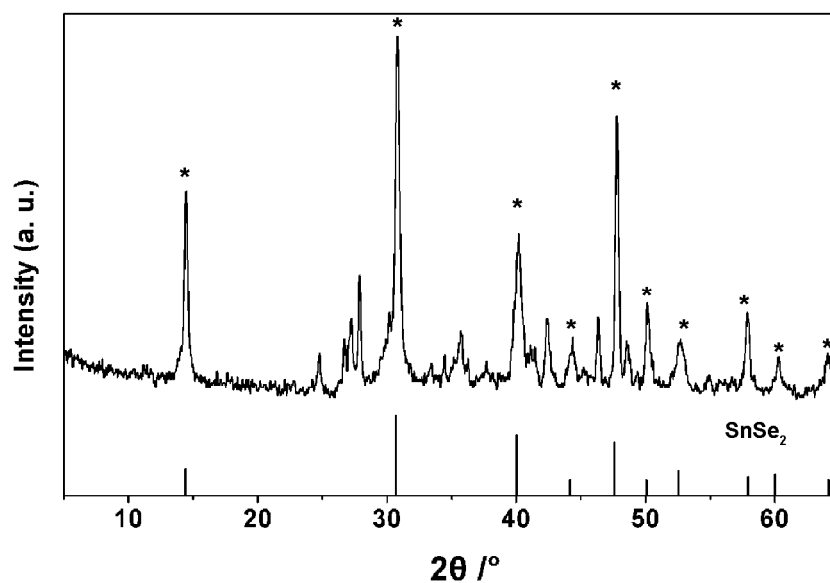

**Fig. S9** The PXRD pattern for the post-TGA residue of compound **1** after heated to 320 °C, identified as a mixture of SnSe<sub>2</sub> and an indefinite powder.



## 2c) Optical absorption properties

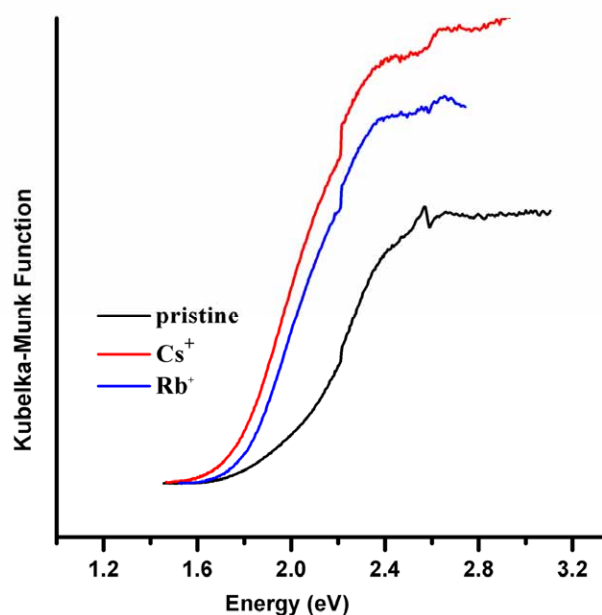

**Fig. S10** Optical absorption spectra for the pristine compounds **1**, Cs<sup>+</sup> and Rb<sup>+</sup>-exchanged products.

## 2d) TGA

The ion-exchange properties of **1** were further confirmed by thermogravimetric analyses (Fig. S11, and Tables S5). The thermal stabilities of **1** and ion-exchanged products were investigated on crystalline samples in a N<sub>2</sub> atmosphere from ~20 to 320 °C. The TGA curve of **1** showed an obvious weight loss of 11.8% from 200-270 °C, which could be attributed to the loss of dimethylammonium ions and the H<sub>2</sub>Se molecule (calcd. 12.2%). The post-TGA residue of **1** was identified as a mixture of SnSe<sub>2</sub> and an indefinite powder by powder X-ray diffraction (Fig. S9). The TGA curves of the Cs<sup>+</sup>- and Rb<sup>+</sup>-exchanged products displayed respective weight losses of solvents/water, unexchanged dimethylammonium ions and H<sub>2</sub>Se molecules, while the weight losses of NH<sub>4</sub><sup>+</sup>-exchanged products included lattice water, NH<sub>4</sub><sup>+</sup>, unexchanged diemethylammonium ions, and H<sub>2</sub>Se, respectively. All the observed weight losses of ion-exchanged products are close to the theoretical values. These results further support the ion-exchange properties of **1**.

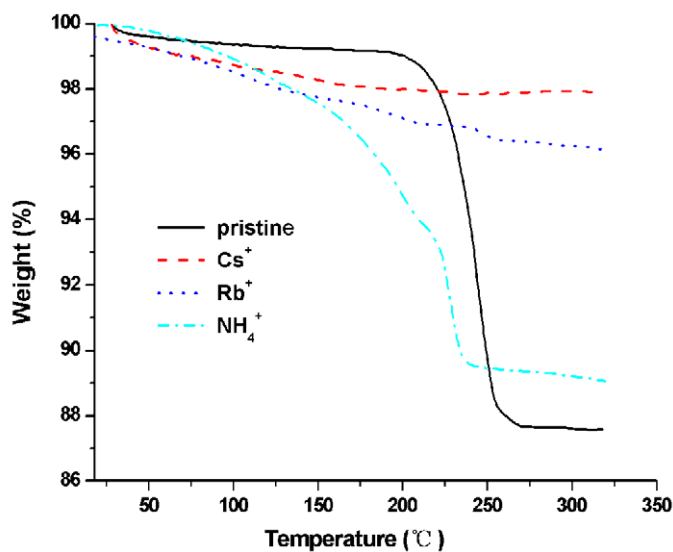

**Fig. S11** TGA curves of the products before and after the ion-exchange experiments.

**Table S5.** Detailed reports on the TGA results of the Cs<sup>+</sup>-, Rb<sup>+</sup>- and NH<sub>4</sub><sup>+</sup>-exchanged products.

| Exchanged cation             | Estimated formula                                                                                               | Experimental weight loss at ~20-320°C                                                                                                                       | Calculated weight loss |
|------------------------------|-----------------------------------------------------------------------------------------------------------------|-------------------------------------------------------------------------------------------------------------------------------------------------------------|------------------------|
| Pristine                     | $[(\text{Me})_2\text{NH}_2]_{0.75}[\text{Ag}_{1.25}\text{SnSe}_3]$                                              | 11.8% (0.75 Me <sub>2</sub> NH <sub>2</sub> + 0.375 H <sub>2</sub> Se)                                                                                      | 12.3%                  |
| Cs <sup>+</sup>              | $[\text{Me}_2\text{NH}_2]_{0.05}\text{Cs}_{0.70}[\text{Ag}_{1.25}\text{SnSe}_3]\cdot 0.25\text{H}_2\text{O}$    | 1.4% (water)<br>0.4% (Me <sub>2</sub> NH <sub>2</sub> + H <sub>2</sub> Se)                                                                                  | 0.8%<br>0.4%           |
| Rb <sup>+</sup>              | $[\text{Me}_2\text{NH}_2]_{0.10}\text{Rb}_{0.65}[\text{Ag}_{1.25}\text{SnSe}_3]\cdot 0.75\text{H}_2\text{O}$    | 1.9 % (0.75 H <sub>2</sub> O)<br>1.3% (0.1 Me <sub>2</sub> NH <sub>2</sub> + 0.05 H <sub>2</sub> Se)                                                        | 2.4%<br>1.5%           |
| NH <sub>4</sub> <sup>+</sup> | $[\text{Me}_2\text{NH}_2]_{0.25}(\text{NH}_4)_{0.50}[\text{Ag}_{1.25}\text{SnSe}_3]\cdot 0.5\text{H}_2\text{O}$ | 1.4% (0.5 H <sub>2</sub> O)<br>4.8% (0.5 NH <sub>4</sub> + 0.25 H <sub>2</sub> Se)<br>4.6% (0.25 Me <sub>2</sub> NH <sub>2</sub> + 0.125 H <sub>2</sub> Se) | 1.7%<br>5.6%<br>4.1%   |

### 3. Dehydration and re-hydration process

Single crystal x-ray analyses and elemental analyses indicated that the ion-exchanged products **1Cs**, **1Rb**, and **1NH<sub>4</sub>** all contain a small amount of lattice water molecules. To investigate if they are thermal stable after dehydration process, the crystalline samples of **1Cs** and **1Rb** were loaded in Al<sub>2</sub>O<sub>3</sub> crucibles and were heated in a NETZSCH STA 449F3 unit at a heating rate of 5 °C/min from room temperature (~20 °C) to 170 °C in a N<sub>2</sub> atmosphere, and then were kept in the unit at 170°C for 20 minutes to assure the removal of lattice water molecules. After cooled to room temperature, the powder x-ray diffraction experiments were performed on the residuals, which indicated that both the residuals of **1Cs** and **1Rb** after dehydration are still crystalline and the framework structures remain intact after the lattice water molecules being removed. Then the residuals were re-hydrated by immersed in water for six hours. TGA from room temperature (~20 °C) to 170 °C for the re-hydrated samples clearly suggested that the water molecules completely came back to the lattices of **1Cs** and **1Rb**, indicating the reversibility of the dehydration and re-hydration processes. All the results were depicted in Figs. S12 to S15.

To explore if the **1NH<sub>4</sub>** compound is stable after removing lattice water molecules and partial NH<sub>4</sub> ions, the crystalline sample of **1NH<sub>4</sub>** was loaded in Al<sub>2</sub>O<sub>3</sub> crucibles and were heated in a NETZSCH STA 449F3 unit at a heating rate of 5 °C/min from room temperature (~20 °C) to 200 °C in a N<sub>2</sub> atmosphere, and then were kept in the unit at 200°C for 20 minutes (Fig. S16). After cooled to room temperature, the powder x-ray diffraction experiment was performed on the residue, which showed extra peaks compared to that of the **1NH<sub>4</sub>** (Fig. S17). This suggested that **1NH<sub>4</sub>** is unstable after removal of lattice water molecules and partial NH<sub>4</sub> ions.

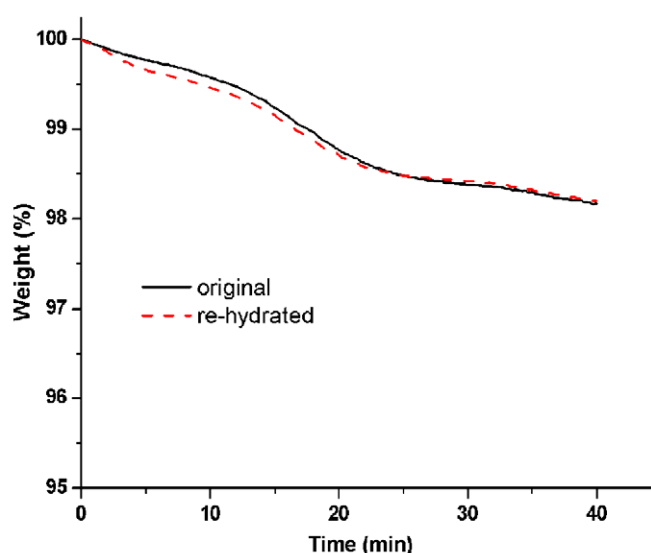

**Fig. S12** The TG curves for the dehydration-rehydration processes of **1Cs**. The black curve showed the dehydration process of the original sample **1Cs**. The red curve showed the dehydration process of the rehydrated sample of **1Cs** after immersed in water for six hours.

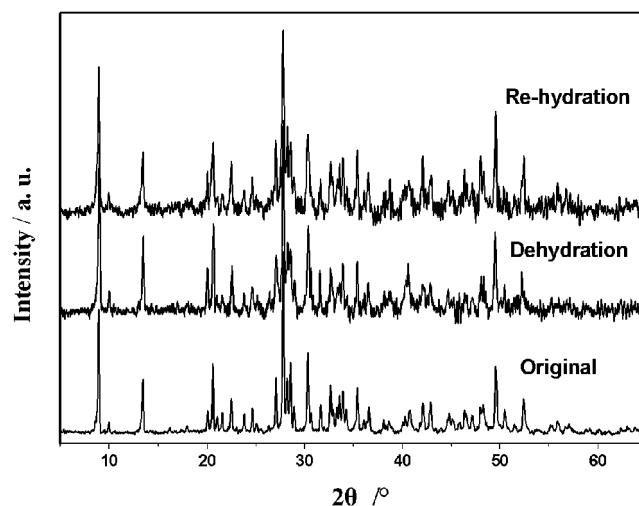

**Fig. S13** Comparison of the PXR D patterns of **1Cs** (bottom), dehydrated **1Cs** after heated at 170 °C for approximate 20 mins (middle) and the rehydrated **1Cs** after immersed in water for six hours (top).

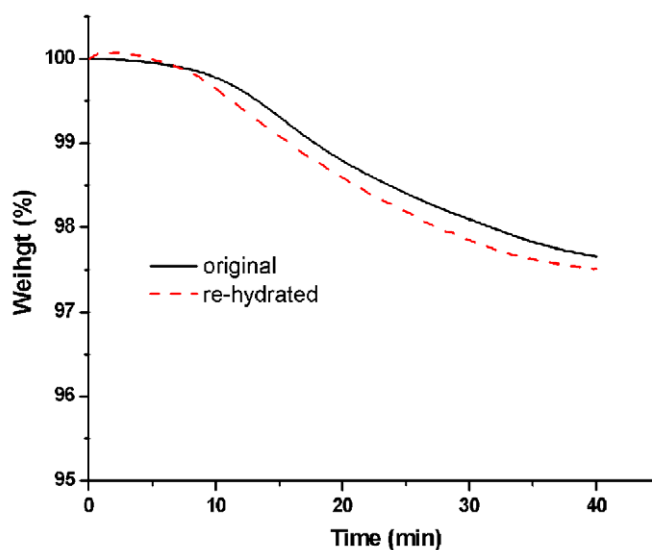

**Fig. S14** The TG curves for the dehydration-rehydration processes of **1Rb**. The black curve showed the dehydration process of the original sample **1Rb**. The red curve showed the dehydration process of the rehydrated sample of **1Rb** after immersed in water for six hours.

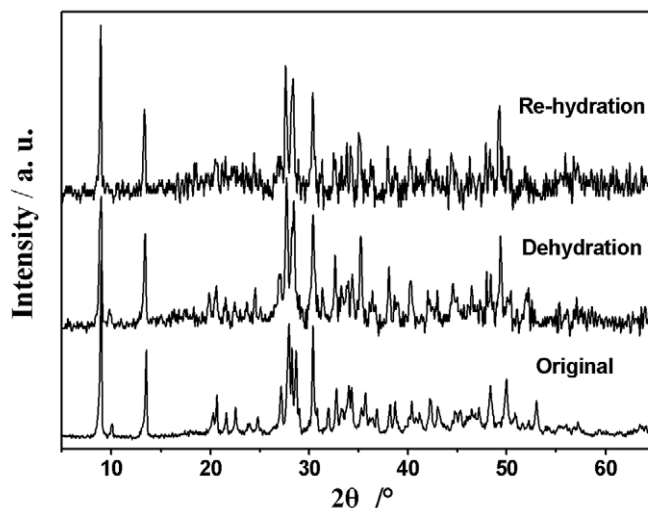

**Fig. S15** Comparison of the PXR D patterns of **1Rb** (bottom), dehydrated **1Rb** after heated at 170 °C for approximate 20 mins (middle) and the rehydrated **1Rb** (top) after immersed in water for six hours.

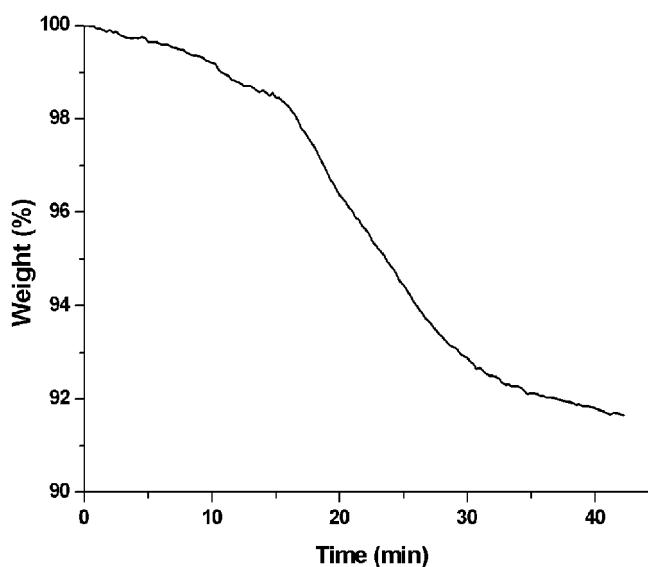

**Fig. S16** TG curve showing the removal of H<sub>2</sub>O and partial NH<sub>4</sub><sup>+</sup> of **1NH<sub>4</sub>** by heating at 200 °C for approximate 20 minutes.

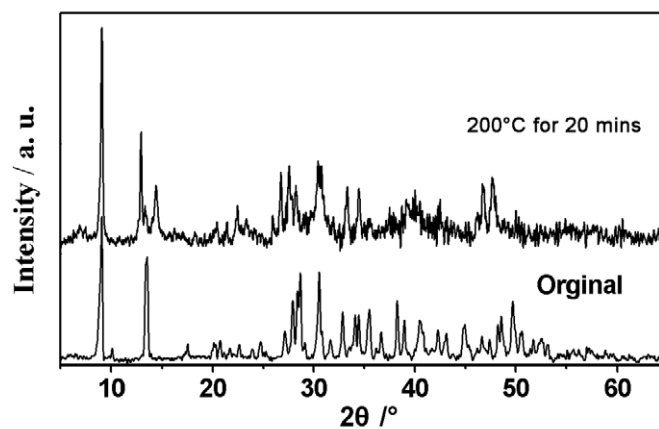

**Fig. S17** Comparison of the room temperature PXRD patterns of **1NH<sub>4</sub>** (bottom) and that of the residue of **1NH<sub>4</sub>** right after heated at 200 °C for approximate 20 minutes (top).
